# Supplementary material
Source: Springer Nature journal article supplement (https://www.springermedizin.de/resource/supplementary/13014_2011_494_MOESM3_ESM.pdf/9633560)
Supplement: MOESM3 [file 9633560]

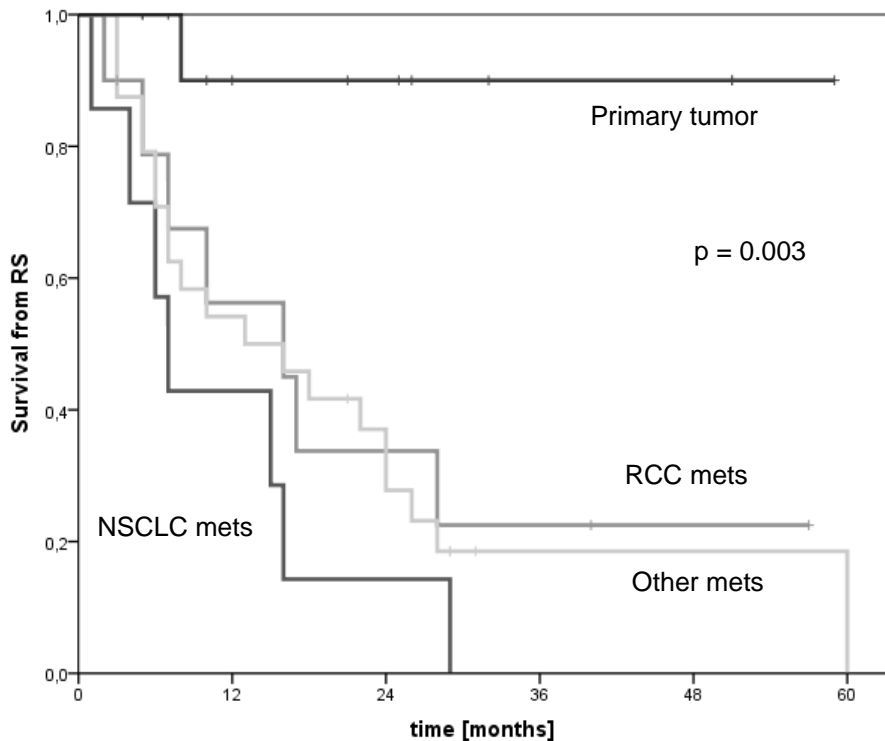

Abbreviations: RS = radiosurgery, mets = metastases; NSCLC = non-small-cell lung cancer; RCC = renal cell carcinoma
